# Supplementary material for: Monocular perceptual learning of contrast detection facilitates binocular combination in adults with anisometropic amblyopia
Source: PubMed Central journal article supplement (PMC4735338; doi:10.1038/srep20187), 2016-02-01

A

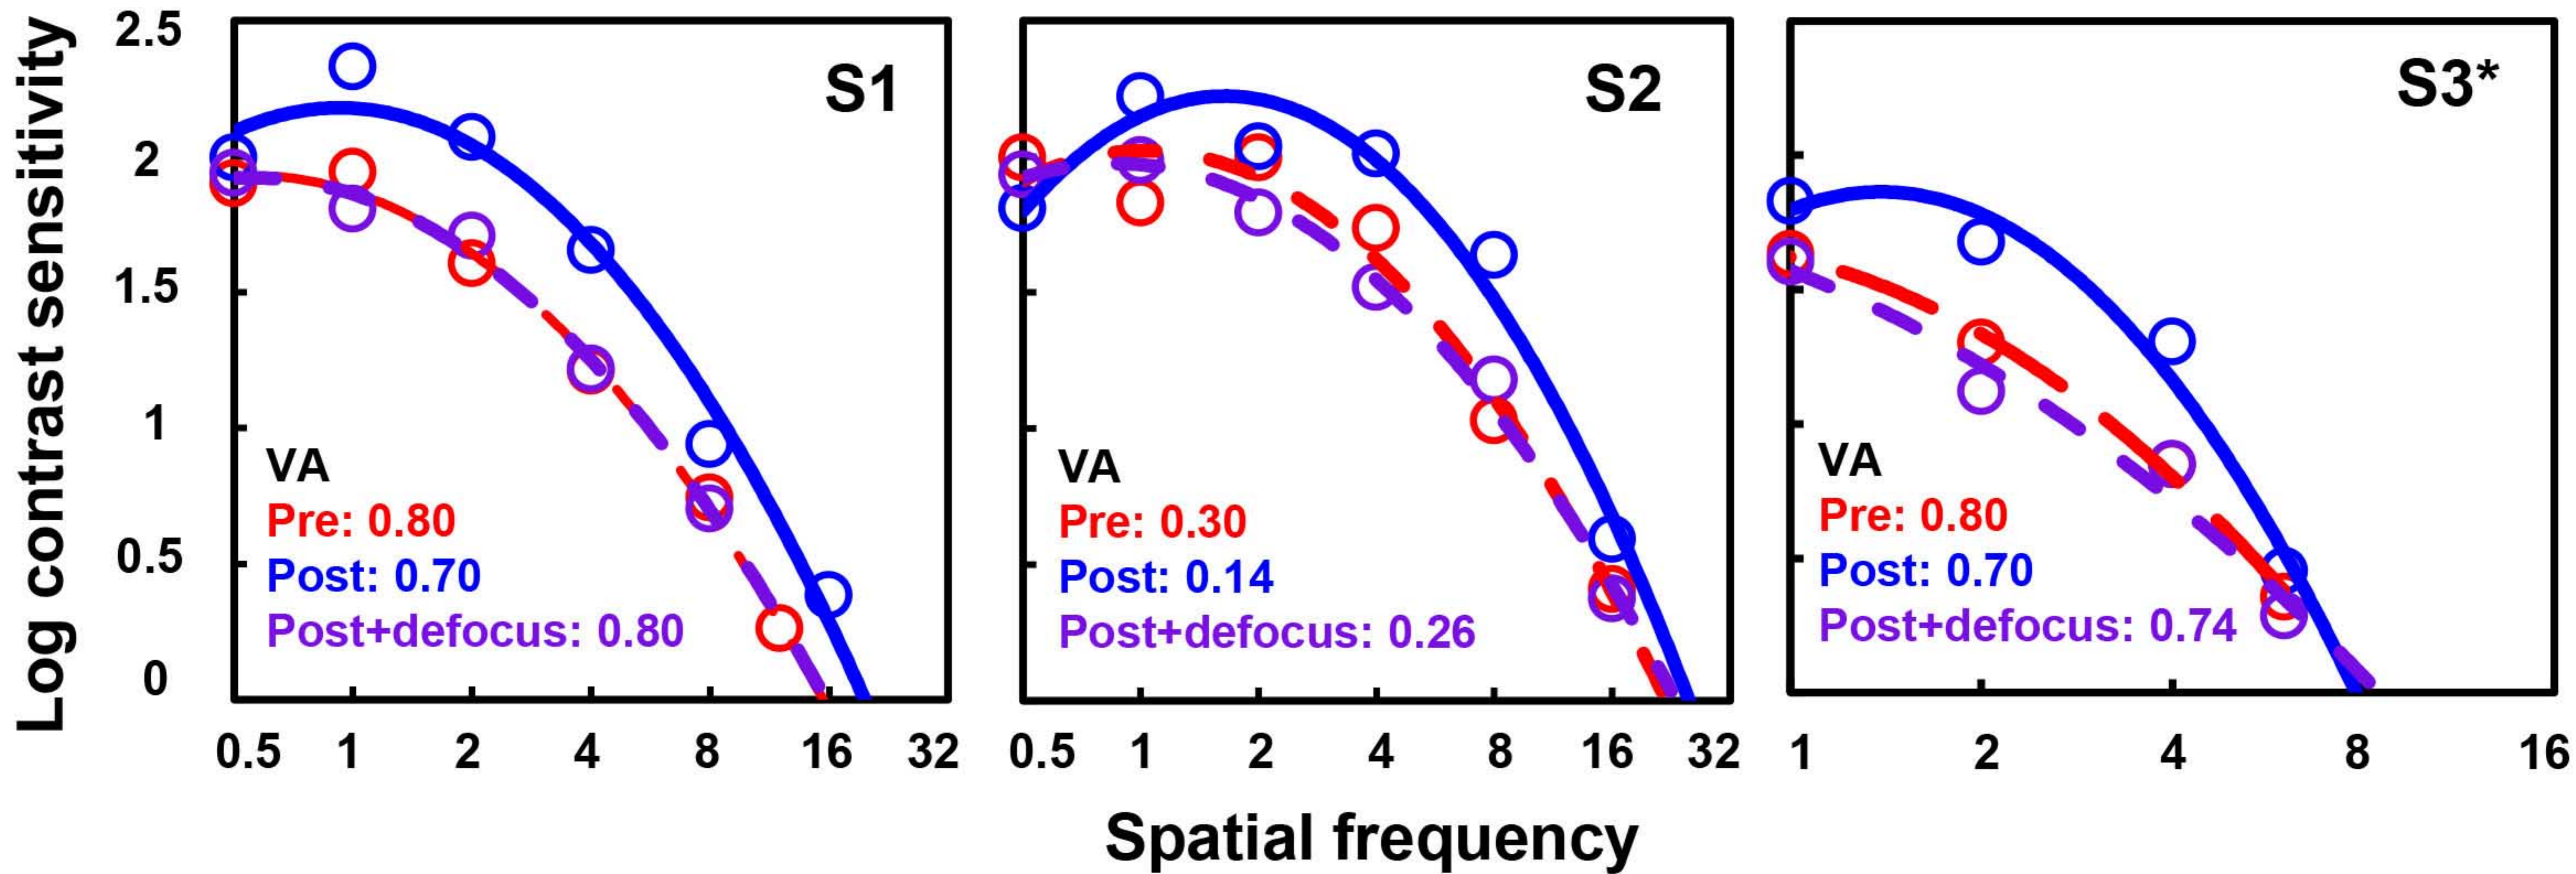

B

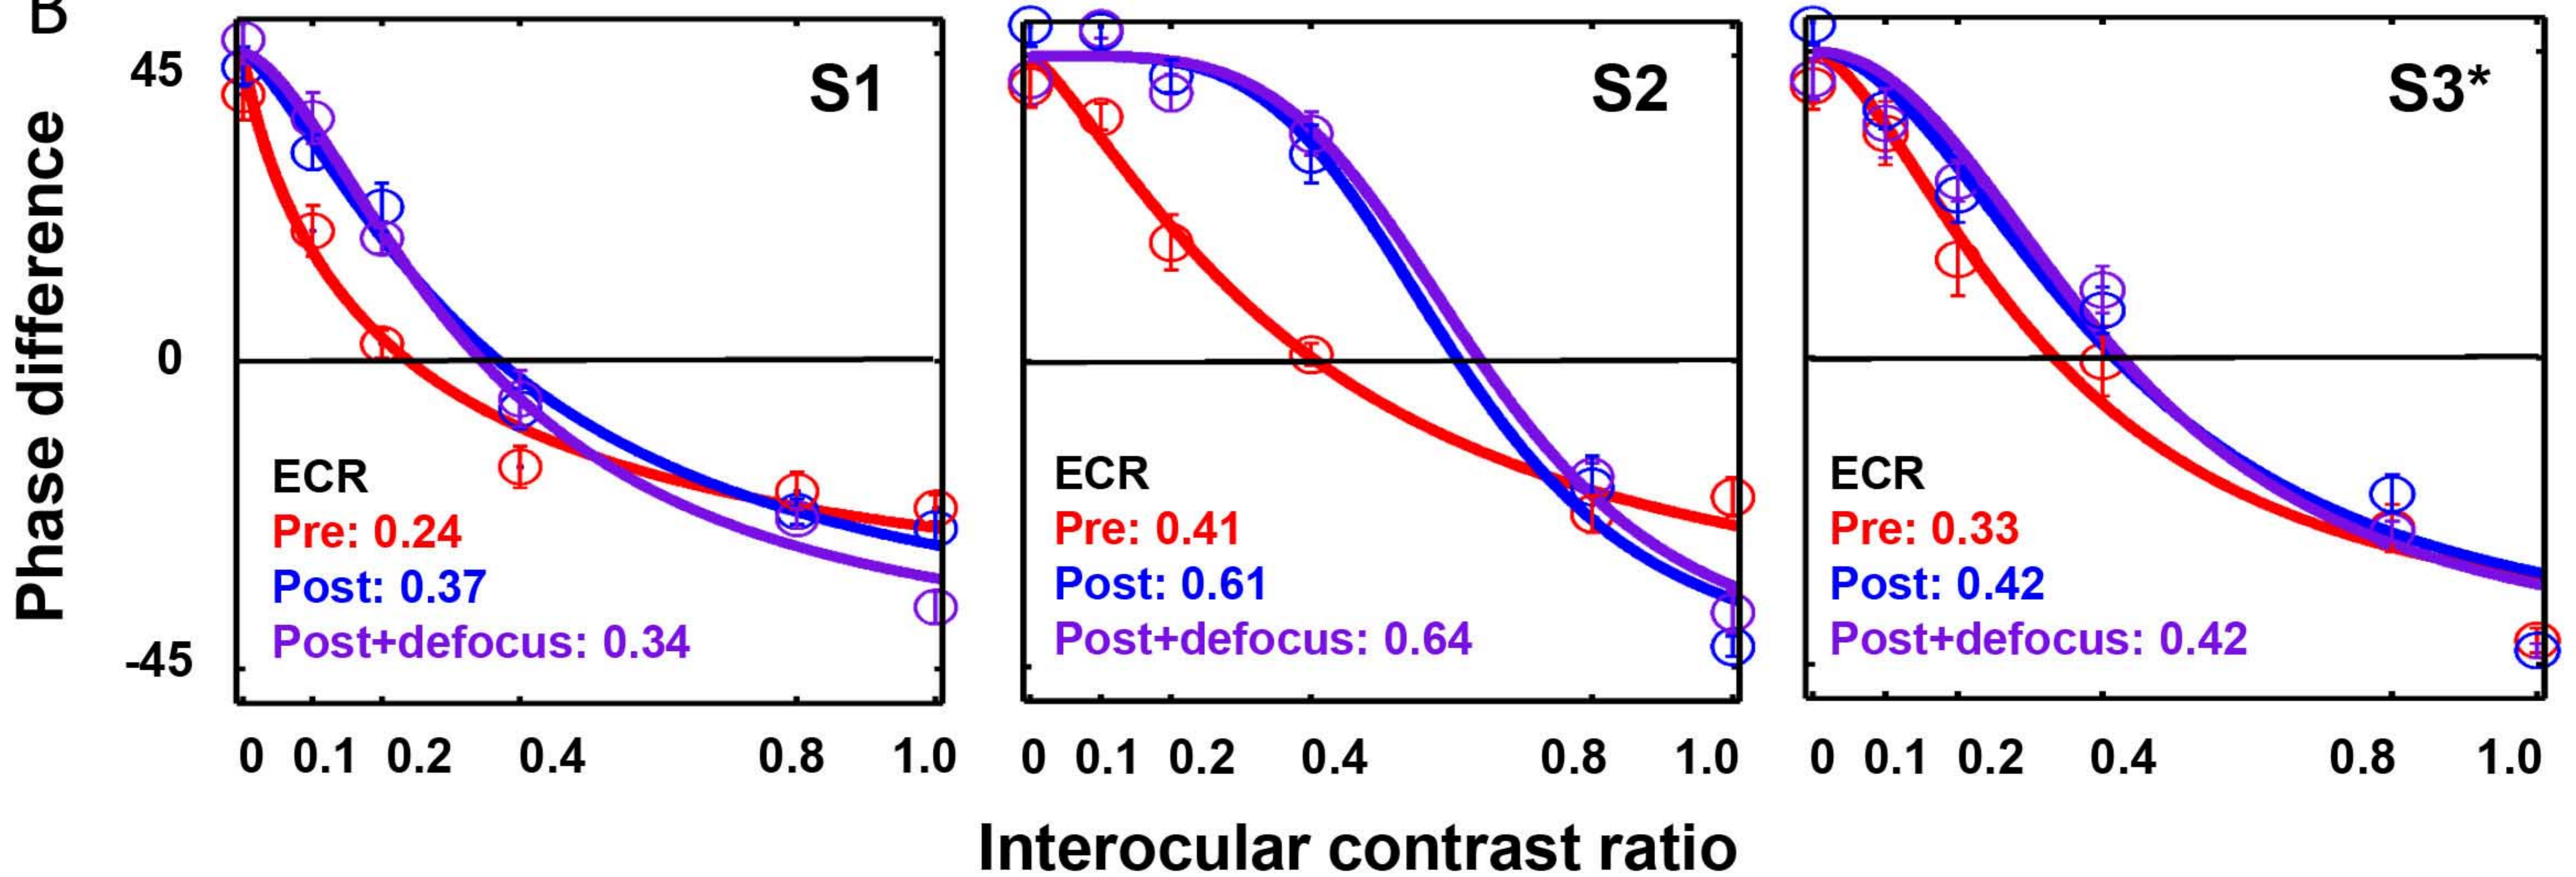

Supplement: srep20187-s1.pdf [file srep20187-s1.pdf]
